# Supplementary material
Source: Research Square preprint supplement (doi:10.21203/rs.3.rs-8544478/v1)
Supplement: Supplementary file 1 [file 1eda2b776ac7d19fccbd8033.docx]

Observed

. mixed observedbc ib2.type##i.stages || herd: || stage: type01, cov(uns)

Performing EM optimization ...

Performing gradient-based optimization:

Iteration 0: Log likelihood = -1383.0043

Iteration 1: Log likelihood = -1382.9666

Iteration 2: Log likelihood = -1382.9666

Computing standard errors ...

Mixed-effects ML regression Number of obs = 314

Grouping information

-------------------------------------------------------------

| No. of Observations per group

Group variable | groups Minimum Average Maximum

----------------+--------------------------------------------

herd | 28 6 11.2 12

stage | 56 1 5.6 6

-------------------------------------------------------------

Wald chi2(3) = 20.81

Log likelihood = -1382.9666 Prob > chi2 = 0.0001

--------------------------------------------------------------------------------------

observedbc | Coefficient Std. err. z P>|z| [95% conf. interval]

---------------------+----------------------------------------------------------------

type |

composite | 3.90359 4.368388 0.89 0.372 -4.658294 12.46547

|

stages |

lactating | -9.640899 2.946617 -3.27 0.001 -15.41616 -3.865636

|

type#stages |

composite#lactating | -8.963652 6.283113 -1.43 0.154 -21.27833 3.351023

|

_cons | 71.98862 2.734443 26.33 0.000 66.62921 77.34803

--------------------------------------------------------------------------------------

------------------------------------------------------------------------------

Random-effects parameters | Estimate Std. err. [95% conf. interval]

-----------------------------+------------------------------------------------

herd: Identity |

var(_cons) | 89.38704 40.11304 37.09302 215.4056

-----------------------------+------------------------------------------------

stage: Unstructured |

var(type01) | 168.4017 109.2267 47.23351 600.4026

var(_cons) | 128.428 96.14412 29.60948 557.0428

cov(type01,_cons) | -120.7421 95.0448 -307.0264 65.54233

-----------------------------+------------------------------------------------

var(Residual) | 301.2888 29.73439 248.3004 365.5853

------------------------------------------------------------------------------

LR test vs. linear model: chi2(4) = 47.14 Prob > chi2 = 0.0000

Note: LR test is conservative and provided only for reference.

Shannon

. mixed shannon4 ib2.type##i.stages || herd: || stage: type01, cov(uns)

Performing EM optimization ...

Performing gradient-based optimization:

Iteration 0: Log likelihood = -2337.4253

Iteration 1: Log likelihood = -2337.1637

Iteration 2: Log likelihood = -2337.162

Iteration 3: Log likelihood = -2337.162

Computing standard errors ...

Mixed-effects ML regression Number of obs = 314

Grouping information

-------------------------------------------------------------

| No. of Observations per group

Group variable | groups Minimum Average Maximum

----------------+--------------------------------------------

herd | 28 6 11.2 12

stage | 56 1 5.6 6

-------------------------------------------------------------

Wald chi2(3) = 16.15

Log likelihood = -2337.162 Prob > chi2 = 0.0011

--------------------------------------------------------------------------------------

shannon4 | Coefficient Std. err. z P>|z| [95% conf. interval]

---------------------+----------------------------------------------------------------

type |

composite | 66.20695 79.55306 0.83 0.405 -89.71417 222.1281

|

stages |

lactating | -199.7034 71.32666 -2.80 0.005 -339.501 -59.90567

|

type#stages |

composite#lactating | -191.2392 114.4864 -1.67 0.095 -415.6284 33.15006

|

_cons | 1336.385 58.75172 22.75 0.000 1221.234 1451.536

--------------------------------------------------------------------------------------

------------------------------------------------------------------------------

Random-effects parameters | Estimate Std. err. [95% conf. interval]

-----------------------------+------------------------------------------------

herd: Identity |

var(_cons) | 26255.63 17627.98 7042.503 97885.35

-----------------------------+------------------------------------------------

stage: Unstructured |

var(type01) | 12968.57 37848.38 42.52916 3954554

var(_cons) | 31878.41 38128.4 3057.813 332339.9

cov(type01,_cons) | -1734.872 33899.48 -68176.62 64706.88

-----------------------------+------------------------------------------------

var(Residual) | 135218.2 13358.91 111414.2 164108

------------------------------------------------------------------------------

LR test vs. linear model: chi2(4) = 50.31 Prob > chi2 = 0.0000

Note: LR test is conservative and provided only for reference.

Pielou

mixed pielou2bc ib2.type##i.stages || herd: || stage: type01, cov(uns) technique(nr bfgs)

Performing EM optimization ...

Performing gradient-based optimization:

(setting technique to nr)

Iteration 0: Log likelihood = -744.78266

Iteration 1: Log likelihood = -743.35069

Iteration 2: Log likelihood = -743.25488

Iteration 3: Log likelihood = -743.24851

Iteration 4: Log likelihood = -743.24846

(switching technique to bfgs)

Iteration 5: Log likelihood = -743.24845

Iteration 6: Log likelihood = -743.24845 (backed up)

Iteration 7: Log likelihood = -743.24845 (backed up)

Iteration 8: Log likelihood = -743.24845 (backed up)

Iteration 9: Log likelihood = -743.24845 (backed up)

(switching technique to nr)

Iteration 10: Log likelihood = -743.24841

Iteration 11: Log likelihood = -743.2484

Computing standard errors ...

Mixed-effects ML regression Number of obs = 314

Grouping information

-------------------------------------------------------------

| No. of Observations per group

Group variable | groups Minimum Average Maximum

----------------+--------------------------------------------

herd | 28 6 11.2 12

stage | 56 1 5.6 6

-------------------------------------------------------------

Wald chi2(3) = 6.44

Log likelihood = -743.2484 Prob > chi2 = 0.0920

--------------------------------------------------------------------------------------

pielou2bc | Coefficient Std. err. z P>|z| [95% conf. interval]

---------------------+----------------------------------------------------------------

type |

composite | -.1602364 .484408 -0.33 0.741 -1.109659 .7891859

|

stages |

lactating | -.8168127 .4989262 -1.64 0.102 -1.79469 .1610648

|

type#stages |

composite#lactating | -.7447114 .6980758 -1.07 0.286 -2.112915 .6234921

|

_cons | 9.753423 .3510492 27.78 0.000 9.065379 10.44147

--------------------------------------------------------------------------------------

------------------------------------------------------------------------------

Random-effects parameters | Estimate Std. err. [95% conf. interval]

-----------------------------+------------------------------------------------

herd: Identity |

var(_cons) | 3.23e-07 2.61e-06 4.32e-14 2.411092

-----------------------------+------------------------------------------------

stage: Unstructured |

var(type01) | .1615263 .2960707 .0044466 5.867579

var(_cons) | 3.705616 1.468704 1.704082 8.058057

cov(type01,_cons) | -.773663 .84208 -2.424109 .8767835

-----------------------------+------------------------------------------------

var(Residual) | 5.277925 .4635194 4.443332 6.26928

------------------------------------------------------------------------------

LR test vs. linear model: chi2(4) = 52.55 Prob > chi2 = 0.0000

Note: LR test is conservative and provided only for reference.

Faith

mixed faith ib2.type##i.stages || herd: || stage: type01, cov(uns) technique(nr bfgs)

Performing EM optimization ...

Performing gradient-based optimization:

(setting technique to nr)

Iteration 0: Log likelihood = -1258.5497

Iteration 1: Log likelihood = -1257.9968

Iteration 2: Log likelihood = -1257.9513

Iteration 3: Log likelihood = -1257.9472

Iteration 4: Log likelihood = -1257.9471

Computing standard errors ...

Mixed-effects ML regression Number of obs = 314

Grouping information

-------------------------------------------------------------

| No. of Observations per group

Group variable | groups Minimum Average Maximum

----------------+--------------------------------------------

herd | 28 6 11.2 12

stage | 56 1 5.6 6

-------------------------------------------------------------

Wald chi2(3) = 8.52

Log likelihood = -1257.9471 Prob > chi2 = 0.0365

--------------------------------------------------------------------------------------

faith | Coefficient Std. err. z P>|z| [95% conf. interval]

---------------------+----------------------------------------------------------------

type |

composite | 2.23283 2.640033 0.85 0.398 -2.94154 7.407201

|

stages |

lactating | -4.92632 1.848821 -2.66 0.008 -8.549943 -1.302697

|

type#stages |

composite#lactating | -2.806277 3.803921 -0.74 0.461 -10.26183 4.649272

|

_cons | 46.67061 1.699046 27.47 0.000 43.34054 50.00068

--------------------------------------------------------------------------------------

------------------------------------------------------------------------------

Random-effects parameters | Estimate Std. err. [95% conf. interval]

-----------------------------+------------------------------------------------

herd: Identity |

var(_cons) | 33.64748 16.87924 12.58774 89.94094

-----------------------------+------------------------------------------------

stage: Unstructured |

var(type01) | 20.12533 26.37907 1.541842 262.6917

var(_cons) | 72.76405 44.77223 21.78545 243.0341

cov(type01,_cons) | -38.26749 35.79533 -108.425 31.89006

-----------------------------+------------------------------------------------

var(Residual) | 144.2011 13.00983 120.8296 172.0934

------------------------------------------------------------------------------

LR test vs. linear model: chi2(4) = 38.88 Prob > chi2 = 0.0000

Note: LR test is conservative and provided only for reference.
